# Supplementary material for: The Volume of Hippocampal Subfields in Relation to Decline of Memory Recall Across the Adult Lifespan
Source: Front Aging Neurosci. 2018 Oct 10;10:320. doi: 10.3389/fnagi.2018.00320 (PMC6191512; doi:10.3389/fnagi.2018.00320)
Supplement: Supplementary file 2 [file Table_2.docx]

Supplementary Material

The volume of hippocampal subfields in relation to decline of memory recall across the adult lifespan

**Fenglian Zheng**1,2,3**#, Dong Cui**4,3**#, Li Zhang**1,2,3**, Shitong Zhang**5,1,2,3**, Yue Zhao**5,1,2,3**, Xiaojing Liu**1,2,3**, Chunhua Liu**6**, Zhengmei Li**1,2,3**, Dongsheng Zhang**1,2,3**, Liting Shi**1,2,3**, Zhipeng Liu**4**, Kun Hou**1,2,3**, Wen Lu**1,2,3**, Tao Yin**4***, Jianfeng Qiu**1,2,3*****

1Medical engineering and technology Research Center, Taishan Medical University, Taian, China

2Imaging-X Joint Laboratory, Taian, China

3College of Radiology, Taishan Medical University, Taian, China

4Institute of Biomedical Engineering, Chinese Academy of Medical Sciences and Peking Union Medical College, Tianjin, China

5College of Mechanical and Electronic Engineering, Shandong University of Science and Technology, Qingdao, China

6School of Basic Medical Sciences, Taishan Medical University, Taian, China

# These authors contributed equally to this work.

*** Correspondence:** Jianfeng Qiu: [jfqiu100@gmail.com](mailto:jfqiu100@gmail.com); Tao Yin: [bme500@163.com](mailto:bme500@163.com)

# Supplementary Tables

**Supplementary Table 2.** The pairwise comparisons of hippocampal subfields volume between Young group, Middle-early group, Middle-late group and Old group.

|  | Young v Middle-early | Young v Middle-late | Young v Old | Middle-early v Middle-late | Middle-early v Old | Middle-late v Old |
| --- | --- | --- | --- | --- | --- | --- |
| Left_whole | 1.000 | 0.169 | <0.001** | 1.000 | <0.001** | <0.001** |
| Left_tail | 1.000 | 1.000 | <0.001** | 1.000 | <0.001** | <0.001** |
| Left_subiculum | 1.000 | 1.000 | <0.001** | 1.000 | 0.007* | 0.009* |
| Left_CA1 | 1.000 | 0.199 | <0.001** | 1.000 | <0.001** | <0.001** |
| Left_fissure | 1.000 | 1.000 | 0.001* | 1.000 | 0.001* | 0.003* |
| Left_presubiculum | 1.000 | 0.652 | <0.001** | 1.000 | 0.092 | 0.137 |
| Left_molecular layer | 1.000 | 0.120 | <0.001** | 1.000 | <0.001** | <0.001** |
| Left_GC-DG | 1.000 | 0.133 | <0.001** | 1.000 | <0.001** | <0.001** |
| Left_CA2/3 | 1.000 | 0.778 | <0.001** | 0.620 | <0.001** | 0.010* |
| Left_CA4 | 1.000 | 0.221 | <0.001** | 1.000 | <0.001** | <0.001** |
| Left_fimbria | 1.000 | 0.064 | <0.001** | 0.315 | <0.001** | 0.003* |
| Left_HATA | 1.000 | 0.595 | <0.001** | 0.211 | <0.001** | <0.001** |
| Right _whole | 1.000 | 1.000 | <0.001** | 1.000 | <0.001** | <0.001** |
| Right_tail | 1.000 | 1.000 | <0.001** | 1.000 | <0.001** | <0.001** |
| Right_subiculum | 1.000 | 0.978 | <0.001** | 1.000 | <0.001** | 0.001* |
| Right_CA1 | 1.000 | 1.000 | <0.001** | 1.000 | <0.001** | <0.001** |
| Right_ fissure | 1.000 | 0.428 | <0.001** | 1.000 | 0.015* | 0.369 |
| Right_presubiculum | 1.000 | 0.338 | <0.001** | 1.000 | <0.001** | <0.001** |
| Right_parasubiculum | 1.000 | 0.293 | 0.056 | 1.000 | 1.000 | 1.000 |
| Right_molecular layer | 1.000 | 0.968 | <0.001** | 1.000 | <0.001** | <0.001** |
| Right_GC-DG | 1.000 | 1.000 | <0.001** | 1.000 | <0.001** | <0.001** |
| Right_CA2/3 | 1.000 | 1.000 | <0.001** | 1.000 | <0.001** | <0.001** |
| Right_CA4 | 1.000 | 1.000 | <0.001** | 1.000 | <0.001** | <0.001** |
| Right_fimbria | 0.478 | 0.015* | <0.001** | 1.000 | <0.001** | 0.001* |
| Right_HATA | 1.000 | 1.000 | <0.001** | 1.000 | <0.001** | <0.001** |

Note: The expressed data is P value of the pairwise comparisons between groups, using Bonferroni method. * P < 0.05, ** P < 0.001.
